# Supplementary material for: Heterostuctures of 4-(chloromethyl)phenyltrichlorosilane and 5,10,15,20-tetra(4-pyridyl)-21H,23H-porphine prepared on Si(111) using particle lithography: Nanoscale characterization of the main steps of nanopatterning
Source: publisher site journal article supplement (doi:10.3762/bjnano.9.112), 2018-04-17
Supplement: Additional file 1 [file 2190-4286-9-112-S1.pdf]

## Supporting Information

for

### Heterostuctures of 4-(chloromethyl)phenyltrichlorosilane and 5,10,15,20-tetra(4-pyridyl)-21*H*,23*H*-porphine prepared on Si(111) using particle lithography: Nanoscale characterization of the main steps of nanopatterning

Phillip C. Chambers and Jayne C. Garno<sup>\*,§</sup>

Address: Department of Chemistry, Louisiana State University, 232 Choppin Hall, Baton Rouge, LA 70803, USA

Email: Jayne C. Garno - jgarno@lsu.edu

\*Corresponding author

§Phone: +1-225-578-8942, Fax: +1-225-5783458

**Size distribution of the heights measured for heterostructures of CMPS and H<sub>2</sub>TPyP.**

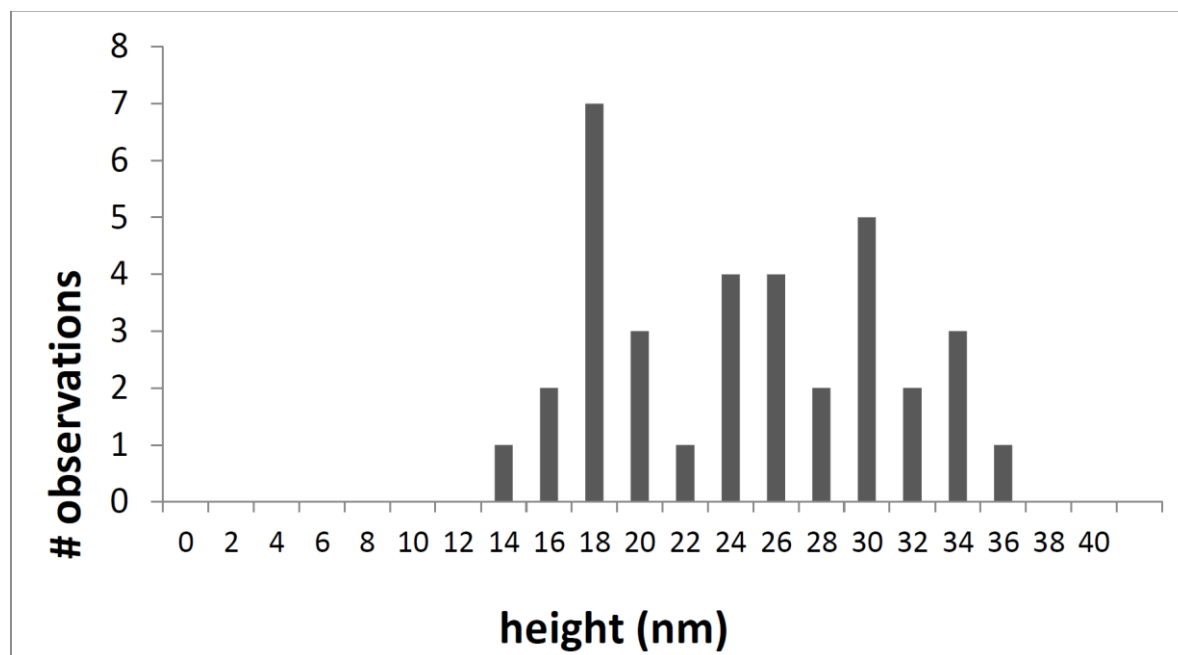

**Figure S1:** Range of heights for nanostructures of H<sub>2</sub>TPyP formed on nanodots of CMPS within a matrix film of OTS formed in BCH. The measurements indicate the height above the surrounding OTS matrix.
